# Supplementary material
Source: PubMed Central journal article supplement (PMC7852553)
Supplement: 41396_2020_779_MOESM1_ESM.pdf [file 41396_2020_779_MOESM1_ESM.pdf]

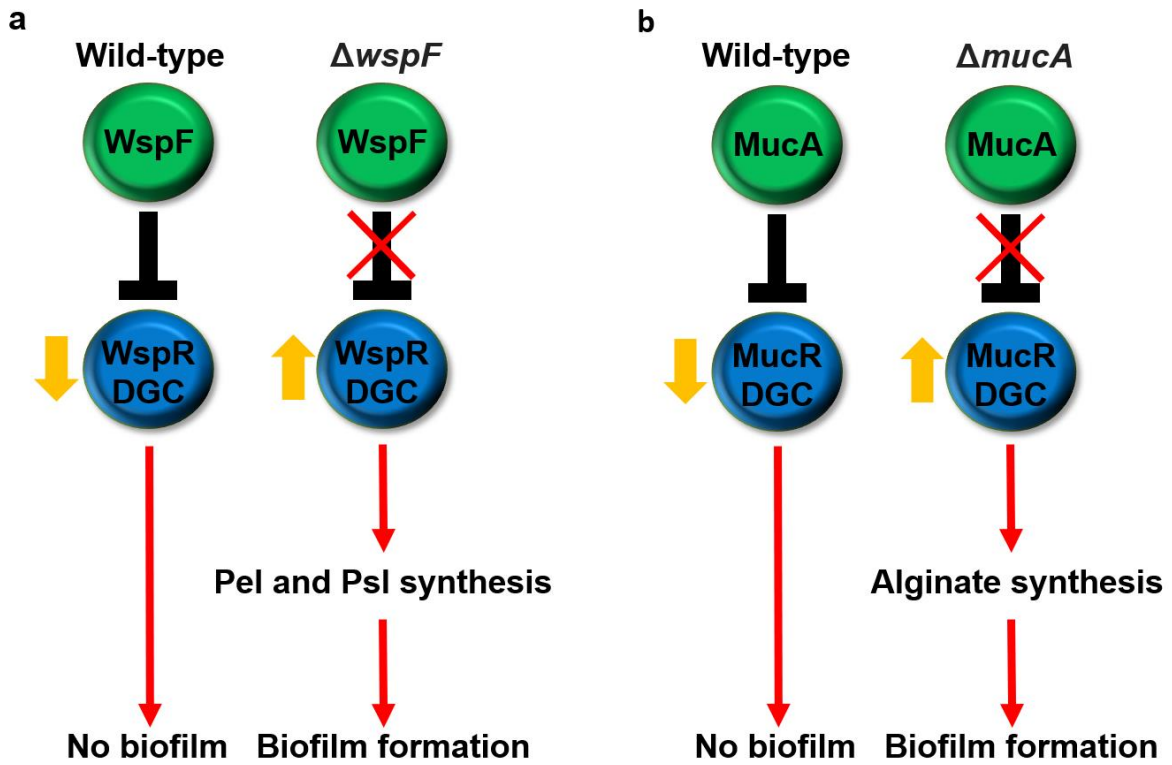

**Supplementary Figure S1.** Schematic diagram of the (a) *wsp* and (b) *muc* operons which regulate exopolysaccharide production and biofilm formation.

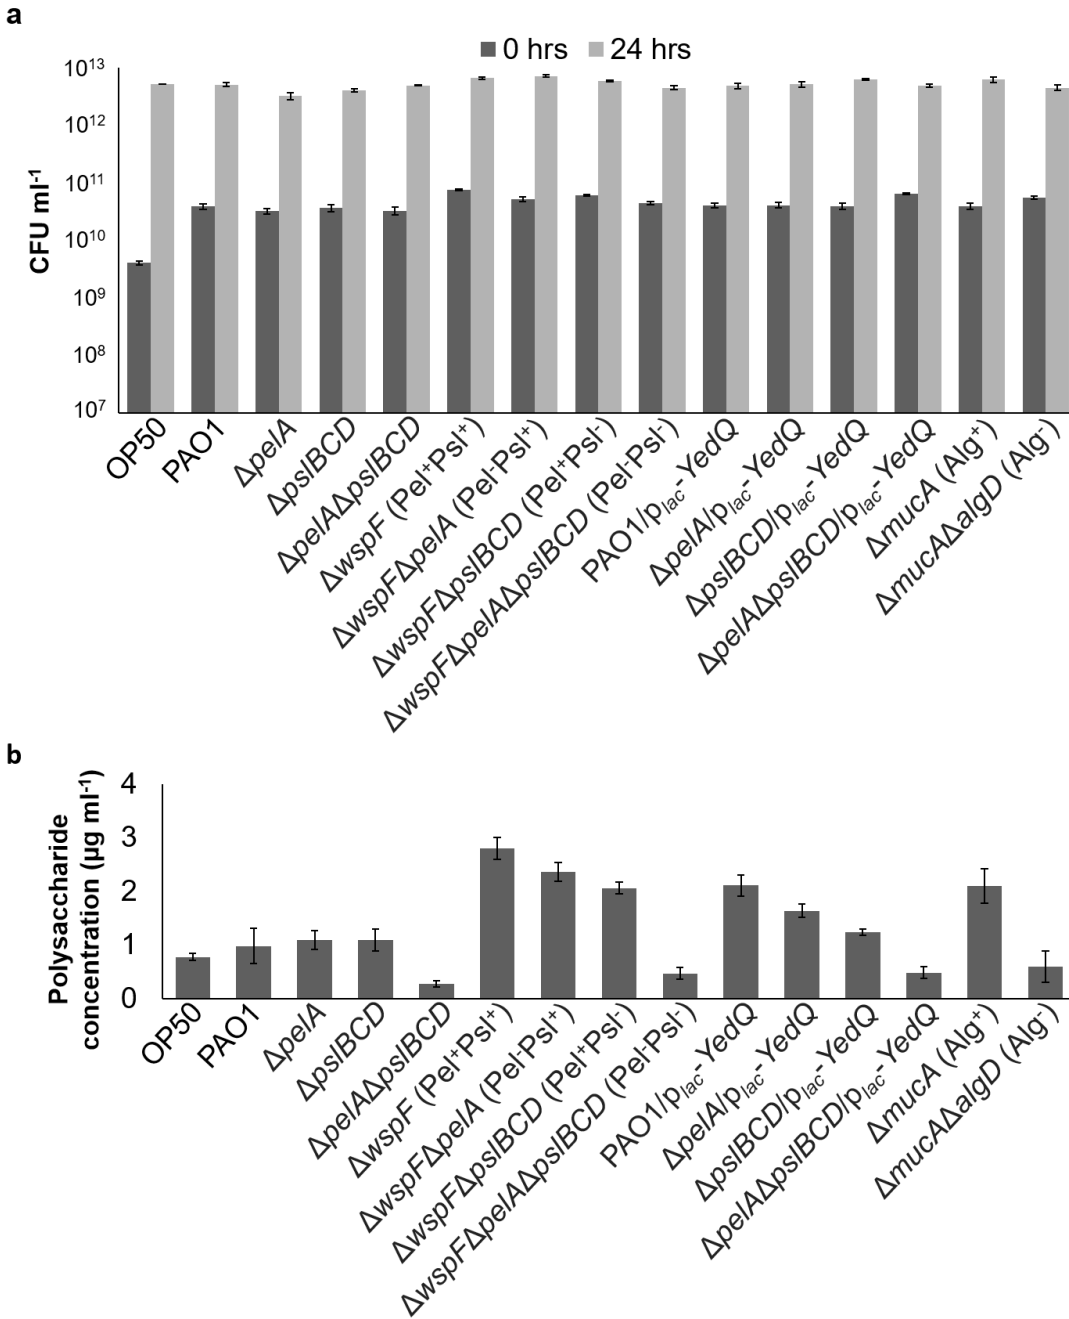

**Supplementary Figure S2. Cell number and associated exopolysaccharide production on bacterial lawns.** (a) CFU ml<sup>-1</sup> and (b) concentration of exopolysaccharides. Means and s.d. from triplicate experiments are shown.

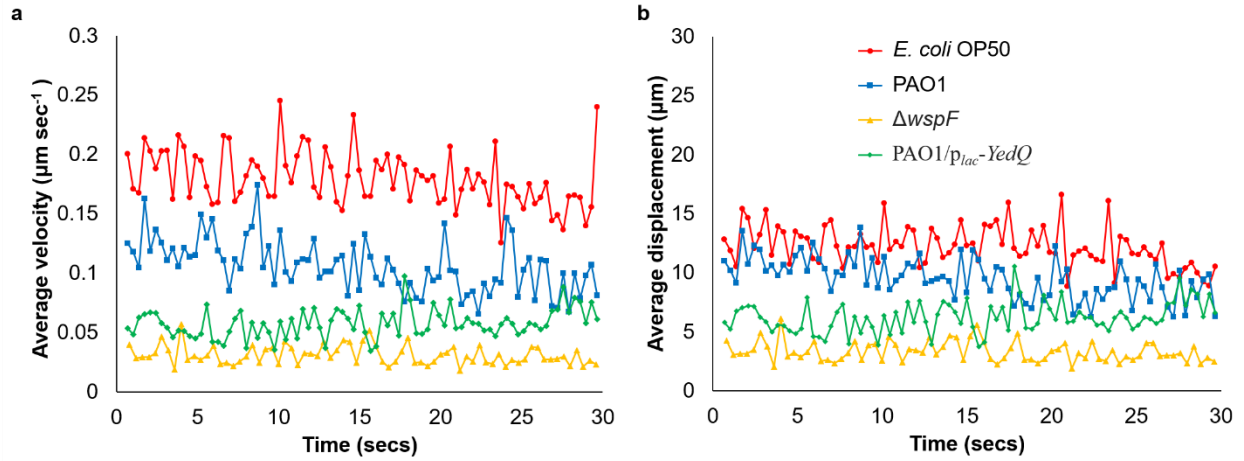

**Supplementary Figure S3.** Biofilms impede locomotion and restrict roaming of *C. elegans*.

(a) Average velocity and (b) average displacement travelled by *C. elegans* on OP50, PAO1,  $\Delta wspF$  and PAO1/ $p_{lac}$ - $YedQ$  lawns over 30 secs. Means and s.d. from triplicate experiments are shown.

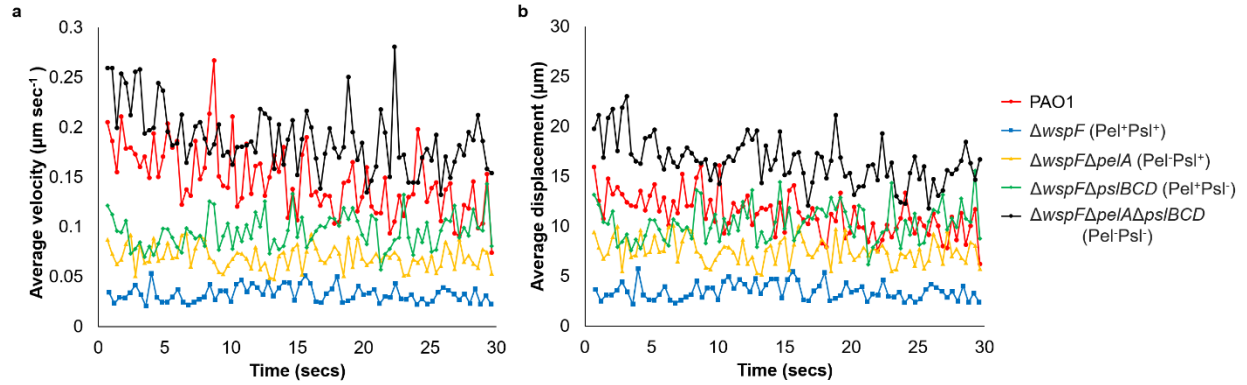

**Supplementary Figure S4.** Psl is more important than Pel at impeding nematode locomotion under influence by *wsp* operon. (a) Average velocity and (b) average displacement travelled by *C. elegans* on EPS mutant lawns over 30 secs. Means and s.d. from triplicate experiments are shown.

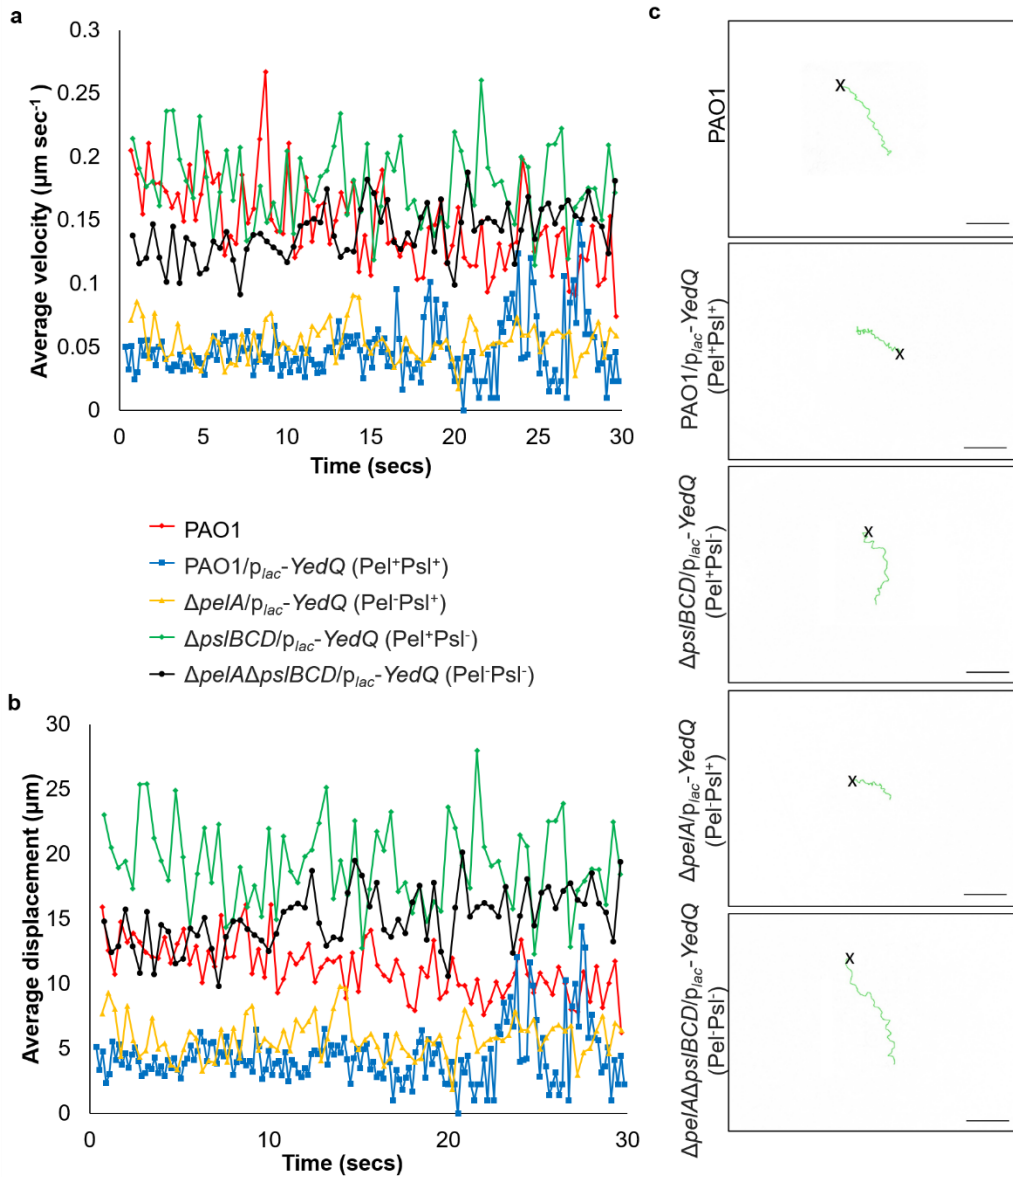

**Supplementary Figure S5.** Psl is more important than Pel at impeding nematode locomotion under influence by  $p_{lac}$ -YedQ. (a) Average velocity, (b) average displacement, and (c) representative tracks travelled by *C. elegans* on EPS mutants/ $p_{lac}$ -YedQ lawns over 30 secs. Means and s.d. from triplicate experiments are shown.

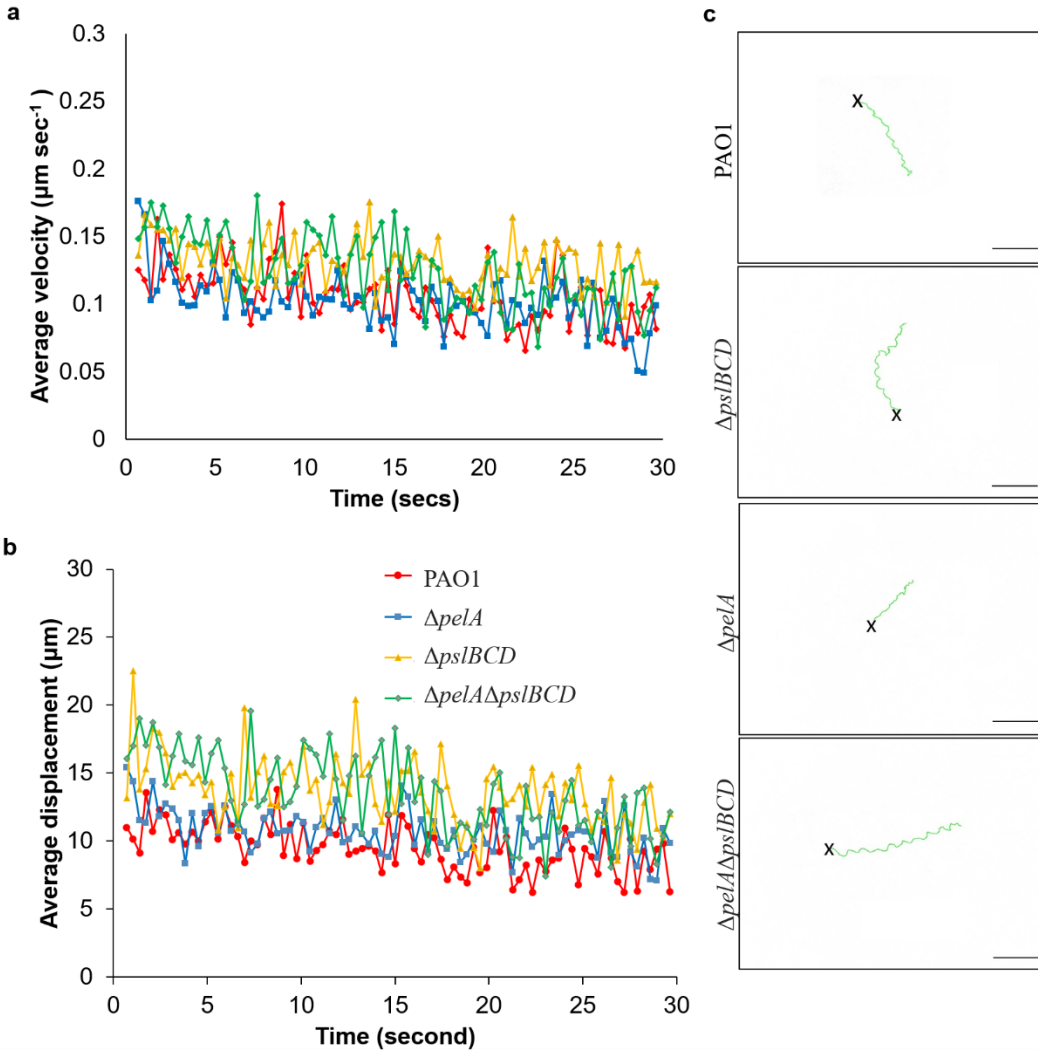

**Supplementary Figure S6.** Psl is more important than Pel at impeding nematode locomotion.

(a) Average velocity, (b) average displacement, and (c) representative tracks travelled by *C. elegans* on EPS mutants lawns over 30 secs. Means and s.d. from triplicate experiments are shown.

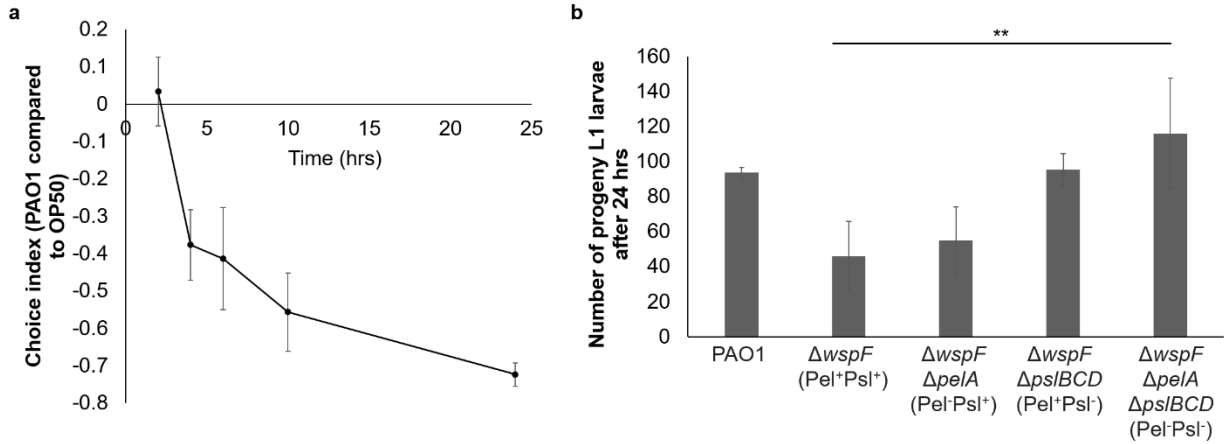

**Supplementary Figure S7.** *E. coli* OP50 is a preferential choice of *C. elegans* for food and reproduction. (a) Food choice index of PAO1 as compared to OP50. (b) Number of progeny L1 larvae hatched from adult nematodes which had escaped from *P. aeruginosa* biofilm trap and reached susceptible OP50 lawns after 24 hrs incubation. Means and s.d. from triplicate experiments are shown. \*\*P < 0.01, \*\*\*P < 0.001, One-Way ANOVA.

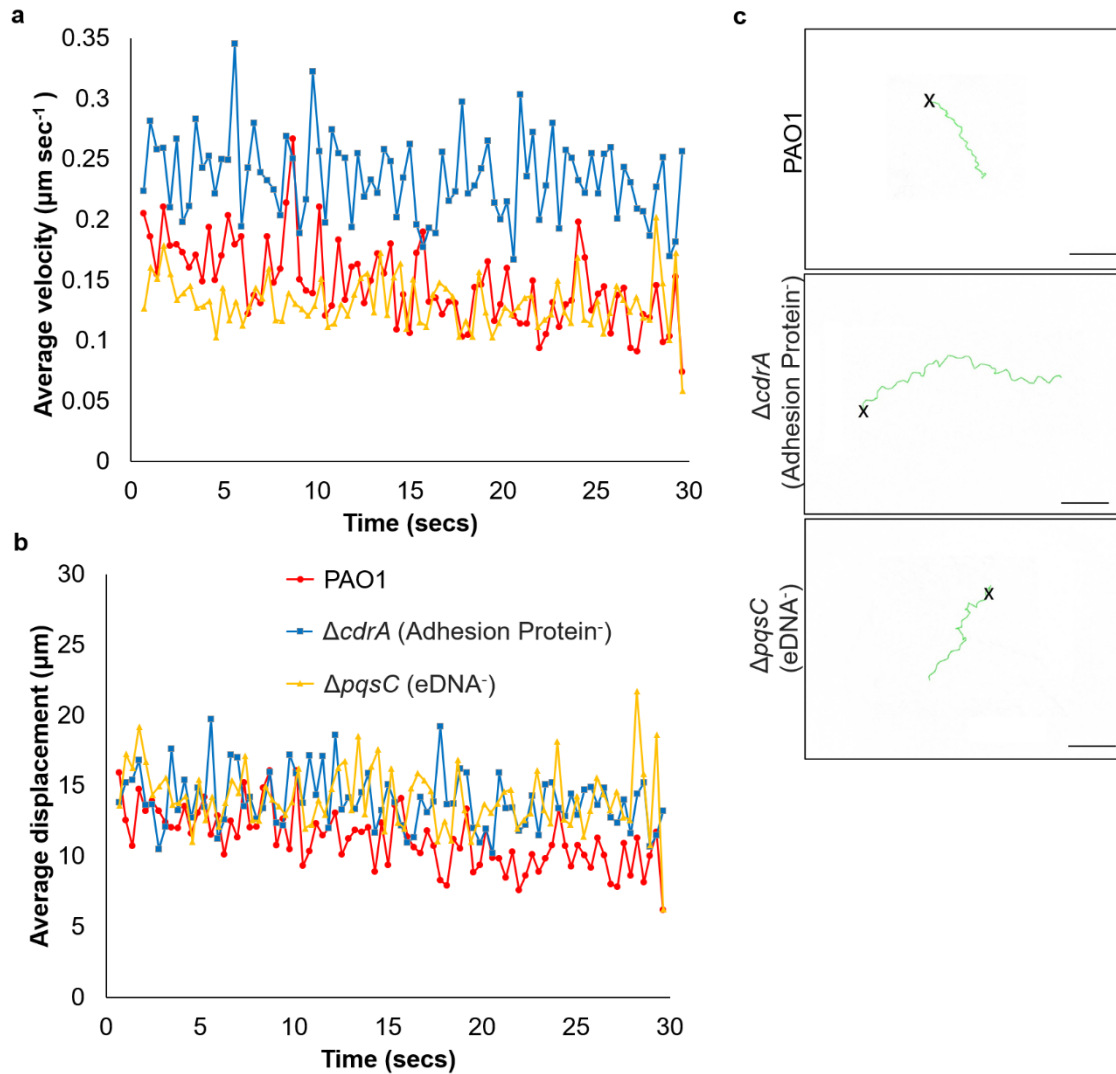

**Supplementary Figure S8.** CdrA adhesion proteins and eDNA are less involved in quagmire phenotype. (a) Average velocity, (b) average displacement, and (c) representative tracks travelled by *C. elegans* on PAO1,  $\Delta\text{cdrA}$  and  $\Delta\text{pqsC}$  lawns over 30 secs. Means and s.d from triplicate experiments are shown.



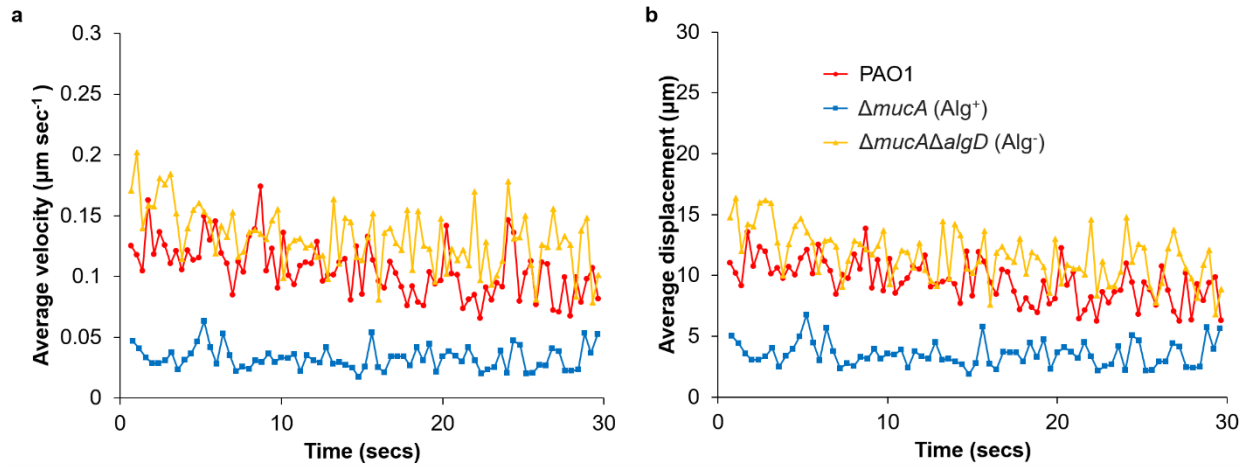

**Supplementary Figure S9.** Role of alginate in the quagmire phenotype. (a) Average velocity and (b) average displacement travelled by *C. elegans* on PAO1, Alg<sup>+</sup> and Alg<sup>-</sup> lawns over 30 secs. Means and s.d. from triplicate experiments are shown.

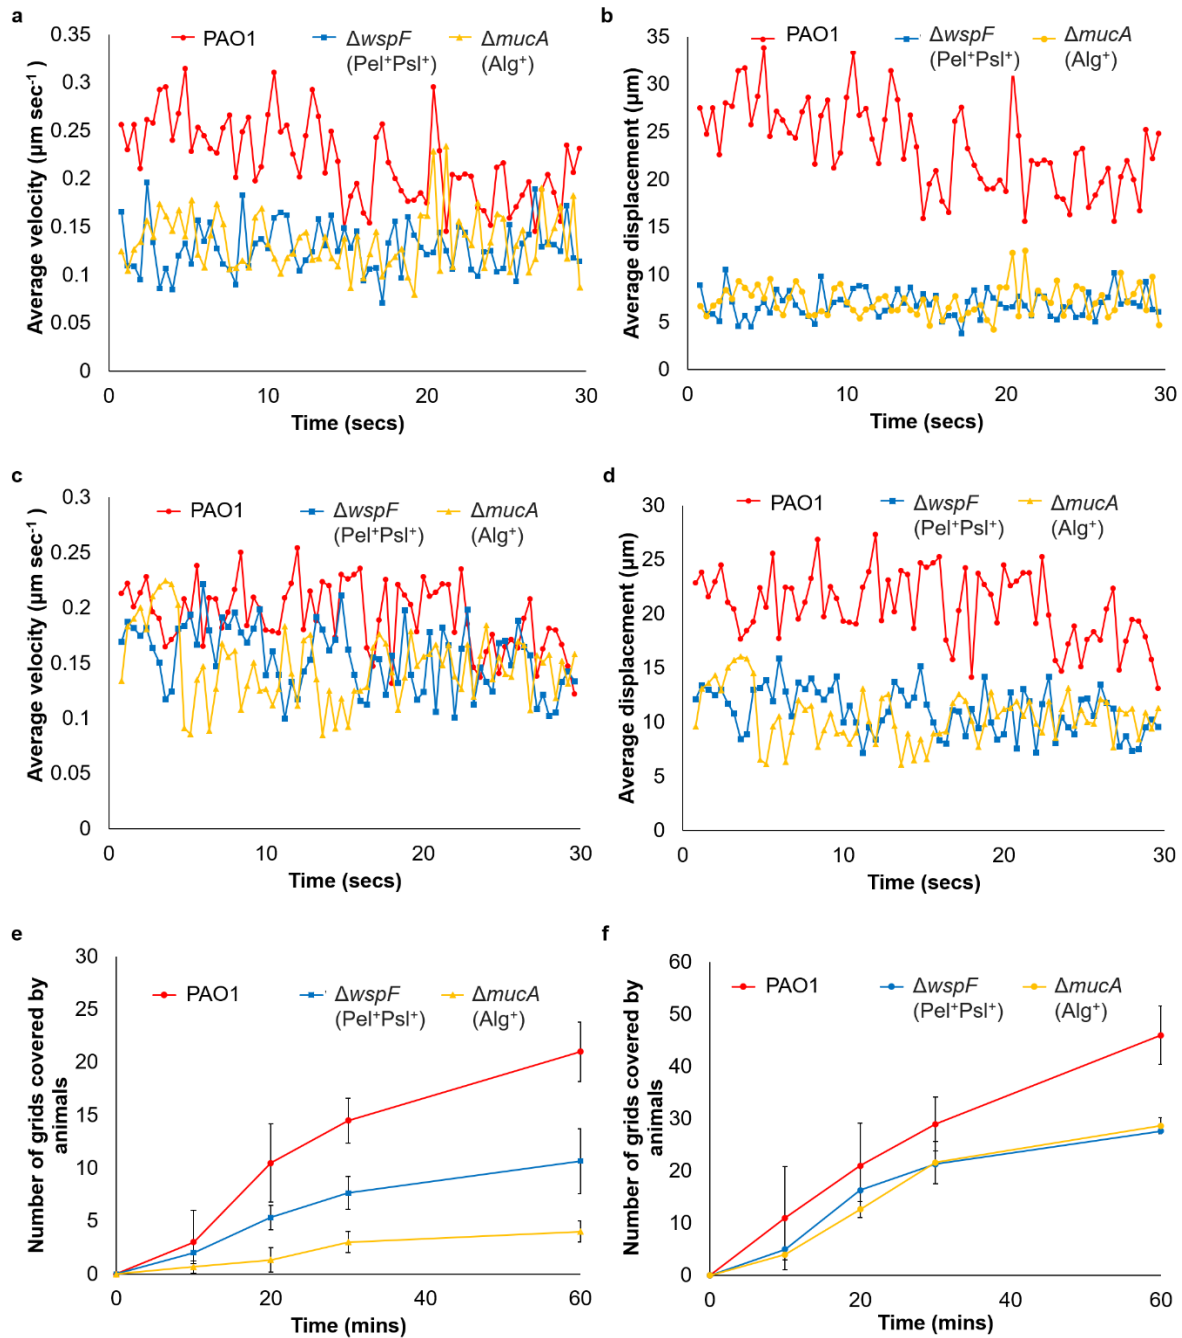

**Supplementary Figure S10.** Biofilms could impede *C. elegans* at L1 larvae and adult stages. (a) Average velocity and (b) average displacement of L1 *C. elegans* larvae on biofilms. (c) Average velocity and (d) average displacement of adult *C. elegans* on biofilms. Extent of roaming of (e) L1 larvae and (f) adult *C. elegans* on bait biofilm after leaving the trap biofilm. Means and s.d. from triplicate experiments are shown.

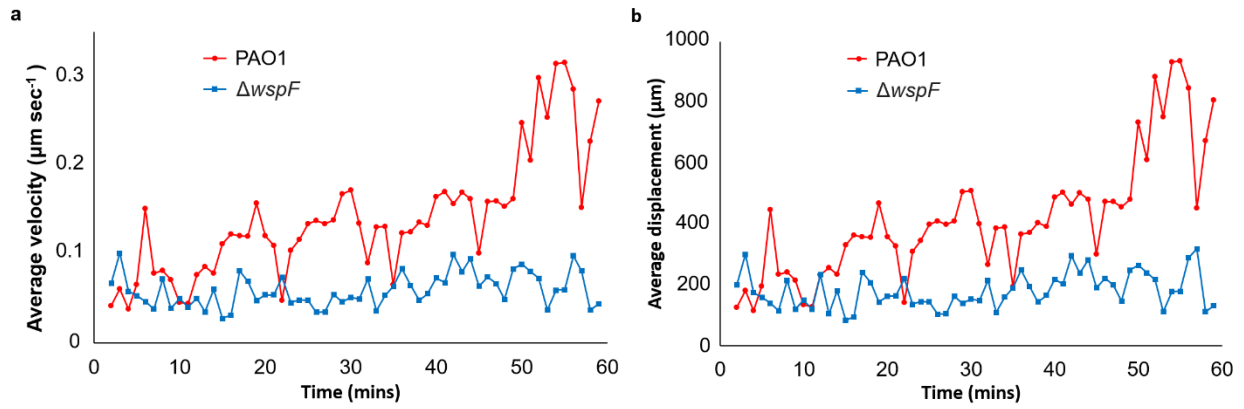

**Supplementary Figure S11.** Biofilms could impede *C. elegans* over prolonged duration of 1 hr.

(a) Average velocity and (b) average displacement of *C. elegans* on biofilms over 1 hr of measurement. Means and s.d. from triplicate experiments are shown.

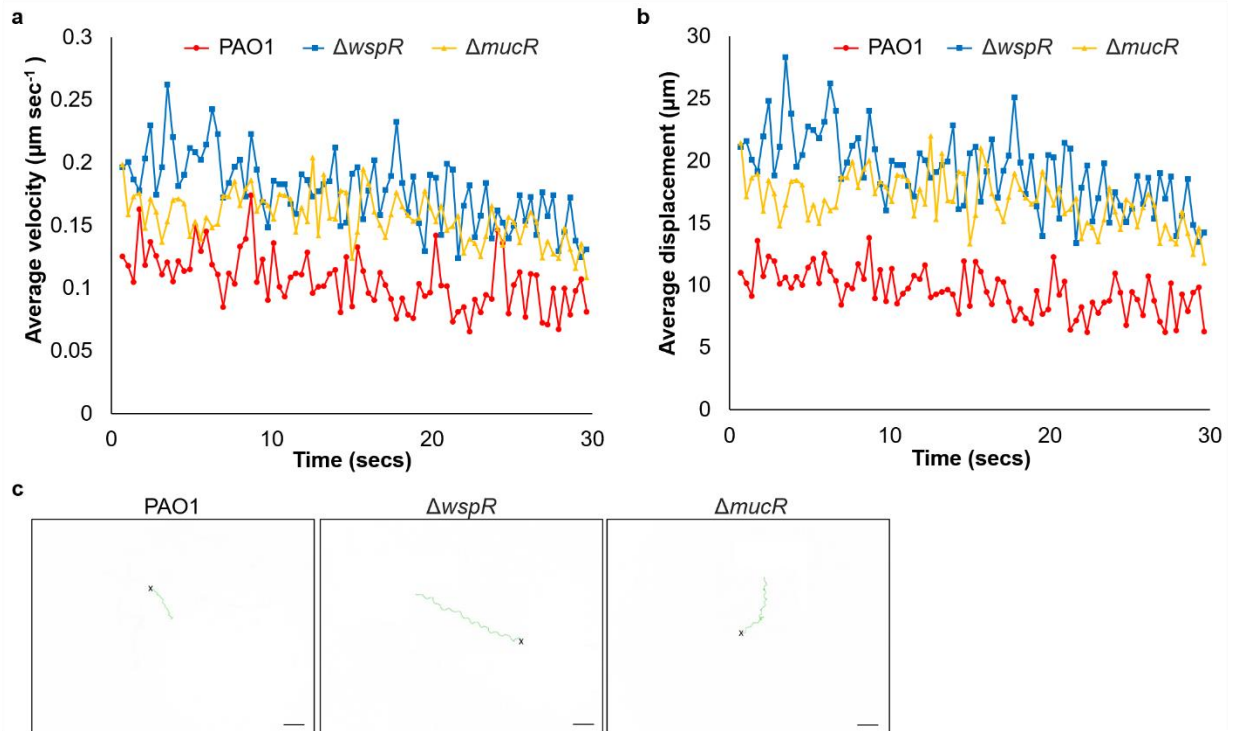

**Supplementary Figure S12.** WspR and MucR are involved in the quagmire phenotype. (a) Average velocity, (b) average displacement and (c) representative tracks travelled by *C. elegans* on PAO1,  $\Delta\text{wspR}$  and  $\Delta\text{mucR}$  over 30 secs. Means and s.d from triplicates experiments are shown.

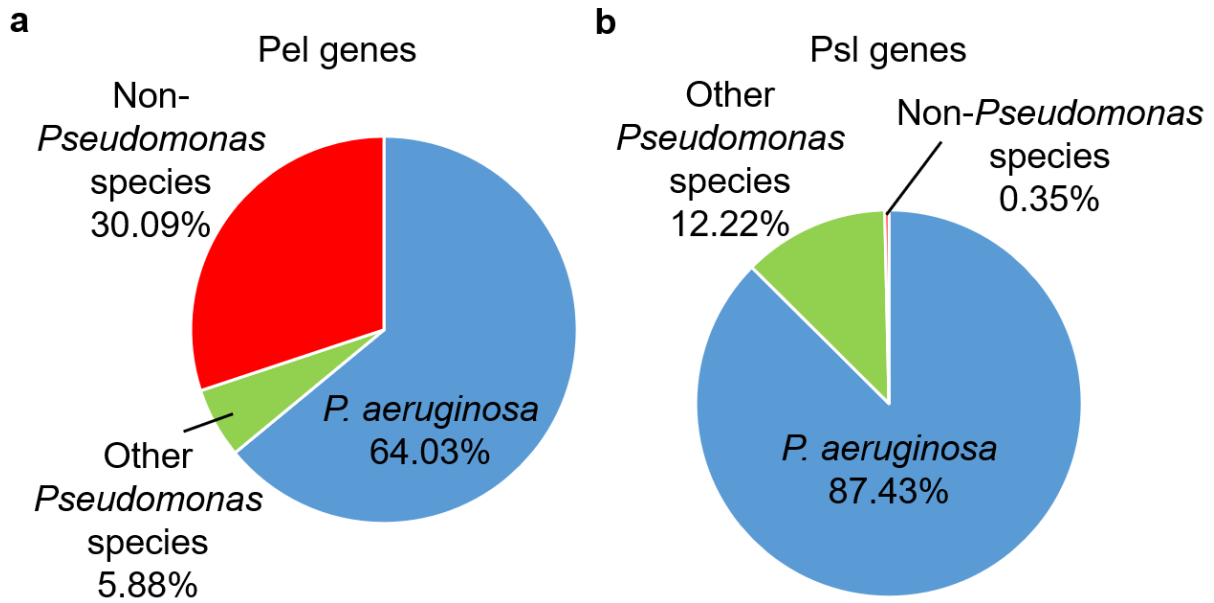

**Supplementary Figure S13.** Presence of (a) Pel and (b) Psl synthesis genes in sequenced microbial species (*P. aeruginosa*, other *Pseudomonas* species and non-*Pseudomonas* species).

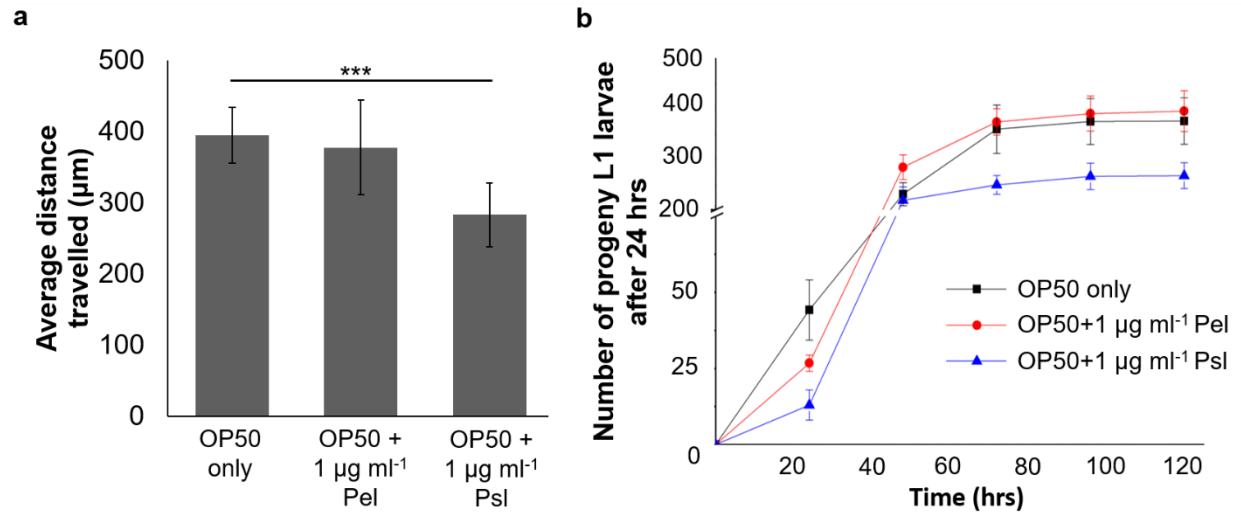

**Supplementary Figure S14.** Exogenous addition of 1 µg ml<sup>-1</sup> Pel or Psl to OP50 strain resulted in (a) reduced average distance and (b) delayed reproduction of progeny of *C. elegans*. \*\*P < 0.01, \*\*\*P < 0.001, n.s (not significant), One-Way ANOVA.

**Supplementary Table S1. Bacterial strains and plasmids used in this study.**

| Strain/ plasmid                               | Description                                                                                           | Source/ Reference |
|-----------------------------------------------|-------------------------------------------------------------------------------------------------------|-------------------|
| <i>P. aeruginosa</i>                          |                                                                                                       |                   |
| PAO1                                          | Prototypic nonmucoid wild-type strain                                                                 | [1]               |
| $\Delta pelA$                                 | Pel exopolysaccharide defective <i>pelA</i> mutant in PAO1                                            | [2]               |
| $\Delta pslBCD$                               | Psl exopolysaccharide defective <i>pelBCD</i> mutant in PAO1                                          | [2]               |
| $\Delta pelA\Delta pslBCD$                    | Pel and Psl exopolysaccharides defective <i>pelA</i> and <i>pslBCD</i> mutant in PAO1                 | [2]               |
| $\Delta wspF$                                 | <i>wspF</i> knockout of PAO1 constructed by allelic exchange                                          | [3]               |
| $\Delta wspF\Delta pelA$                      | Pel exopolysaccharide defective <i>pelA</i> mutant in $\Delta wspF$ mutant                            | This study        |
| $\Delta wspF\Delta pslBCD$                    | Psl exopolysaccharide defective <i>pelBCD</i> mutant in $\Delta wspF$ mutant                          | This study        |
| $\Delta wspF\Delta pelA\Delta pslBCD$         | Pel and Psl exopolysaccharides defective <i>pelA</i> and <i>pslBCD</i> mutant in $\Delta wspF$ mutant | [3]               |
| PAO1/ <i>p<sub>lac</sub>-YedQ</i>             | Gm <sup>r</sup> ; PAO1 containing the <i>plac-yedQ</i> vector                                         | [4]               |
| $\Delta pelA$ / <i>p<sub>lac</sub>-YedQ</i>   | Gm <sup>r</sup> ; PAO1/ $\Delta pelA$ containing the <i>plac-yedQ</i> vector                          | [4]               |
| $\Delta pslBCD$ / <i>p<sub>lac</sub>-YedQ</i> | Gm <sup>r</sup> ; PAO1/ $\Delta pslBCD$ containing the <i>plac-yedQ</i>                               | [4]               |

|                                             |                                                                                                                                                                                                                                                                  |                       |
|---------------------------------------------|------------------------------------------------------------------------------------------------------------------------------------------------------------------------------------------------------------------------------------------------------------------|-----------------------|
| $\Delta pelA \Delta pslBCD / p_{lac-} YedQ$ | Gm <sup>r</sup> ; PAO1/ $\Delta pelA \Delta pslBCD$ containing the $p_{lac-} yedQ$ vector                                                                                                                                                                        | [4]                   |
| $\Delta mucA$                               | <i>mucA</i> knockout of PAO1 constructed by allelic exchange                                                                                                                                                                                                     | [5]                   |
| $\Delta mucA \Delta algT$                   | Alginate exopolysaccharide defective <i>algT</i> mutant in $\Delta mucA$ mutant                                                                                                                                                                                  | [5]                   |
| $\Delta cdrA$                               | <i>cdrA</i> knockout of PAO1 constructed by allelic exchange                                                                                                                                                                                                     | This study            |
| $\Delta pqsC$                               | <i>pqsC</i> knockout of PAO1 constructed by allelic exchange                                                                                                                                                                                                     | [6]                   |
| $\Delta wspR$                               | <i>wspR</i> knockout of PAO1 constructed by allelic exchange                                                                                                                                                                                                     | This study            |
| $\Delta mucR$                               | <i>mucR</i> knockout of PAO1 constructed by allelic exchange                                                                                                                                                                                                     | This study            |
| <b><i>E. coli</i></b>                       |                                                                                                                                                                                                                                                                  |                       |
| OP50                                        | Used for maintenance of <i>C. elegans</i>                                                                                                                                                                                                                        | Laboratory collection |
| DH5 $\alpha$                                | F <sup>-</sup> , $\phi 80dlacZ \Delta M15$ , $\Delta(lacZYA-argF)U169$ , <i>deoR</i> , <i>recA1</i> , <i>endA1</i> , <i>hsdR17</i> (rK <sup>-</sup> , mK <sup>+</sup> ), <i>phoA</i> , <i>supE44</i> , $\lambda^-$ , <i>thi-1</i> , <i>gyrA96</i> , <i>relA1</i> | Laboratory collection |
| <b>Plasmid</b>                              |                                                                                                                                                                                                                                                                  |                       |
| pUCp22                                      | Ap <sup>r</sup> and Gm <sup>r</sup> ; broad-host-range cloning vector                                                                                                                                                                                            | [7]                   |
| $p_{lac-} YedQ$                             | Gm <sup>r</sup> ; pUCP22 carrying the <i>yedQ</i> gene                                                                                                                                                                                                           | [4]                   |



**Supplementary Videos:**

**Supplementary Video 1.** *C. elegans* locomotion on *E. coli* OP50.

**Supplementary Video 2.** *C. elegans* locomotion on *P. aeruginosa* PAO1.

**Supplementary Video 3.** *C. elegans* locomotion on  $\Delta wspF$  (Pel<sup>+</sup>Psl<sup>+</sup>).

**Supplementary Video 4.** *C. elegans* locomotion on PAO1/*p<sub>lac</sub>-YedQ* (Pel<sup>+</sup>Psl<sup>+</sup>).

**Supplementary Video 5.** *C. elegans* locomotion on  $\Delta wspF\Delta pelA\Delta pslBCD$  (Pel<sup>-</sup>Psl<sup>-</sup>).

**Supplementary Video 6.** *C. elegans* locomotion on  $\Delta wspF\Delta pelA$  (Pel<sup>-</sup>Psl<sup>+</sup>).

**Supplementary Video 7.** *C. elegans* locomotion on  $\Delta wspF\Delta pslBCD$  (Pel<sup>+</sup>Psl<sup>-</sup>).

**Supplementary Video 8.** *C. elegans* locomotion on  $\Delta pelA/p_{lac}-YedQ$  (Pel<sup>-</sup>Psl<sup>+</sup>).

**Supplementary Video 9.** *C. elegans* locomotion on  $\Delta pslBCD/p_{lac}-YedQ$  (Pel<sup>+</sup>Psl<sup>-</sup>).

**Supplementary Video 10.** *C. elegans* locomotion on  $\Delta pelA\Delta pslBCD/p_{lac}-YedQ$  (Pel<sup>-</sup>Psl<sup>-</sup>).

**Supplementary Video 11.** *C. elegans* locomotion on  $\Delta pelA$ .

**Supplementary Video 12.** *C. elegans* locomotion on  $\Delta pslBCD$ .

**Supplementary Video 13.** *C. elegans* locomotion on  $\Delta pelA\Delta pslBCD$ .

**Supplementary Video 14.** *C. elegans* locomotion on  $\Delta mucA$  (Alg<sup>+</sup>).

**Supplementary Video 15.** *C. elegans* locomotion on  $\Delta mucA\Delta algD$ (Alg<sup>-</sup>).

**Supplementary Data:**

**Supplementary Data S1.** List of *P. aeruginosa* sequenced isolates containing mutations in *wspF* gene and WspF protein.

**Supplementary Data S2.** List of sequenced bacterial species found in *C. elegans* native microbiome, which contain *pel* and *psl* genes.

**Supplementary Data S3.** List of all sequenced bacterial species containing *pel* and *psl* genes.

## References:

1. B W Holloway, a. and A.F. Morgan, *Genome Organization in Pseudomonas*. Annual Review of Microbiology, 1986. **40**(1): p. 79-105.
2. Yang, L., Y. Hu, Y. Liu, J. Zhang, J. Ulstrup, and S. Molin, *Distinct roles of extracellular polymeric substances in Pseudomonas aeruginosa biofilm development*. Environmental Microbiology, 2011. **13**(7): p. 1705-1717.
3. Rybtke, M.T., B.R. Borlee, K. Murakami, Y. Irie, M. Hentzer, T.E. Nielsen, et al., *Fluorescence-Based Reporter for Gauging Cyclic Di-GMP Levels in Pseudomonas aeruginosa*. Applied and Environmental Microbiology, 2012. **78**(15): p. 5060-5069.
4. Chen, Y., M. Yuan, A. Mohanty, J.K.H. Yam, Y. Liu, S.L. Chua, et al., *Multiple diguanylate cyclase-coordinated regulation of pyoverdine synthesis in Pseudomonas aeruginosa*. Environmental Microbiology Reports, 2015. **7**(3): p. 498-507.
5. Yang, L., Y. Liu, T. Markussen, N. Høiby, T. Tolker-Nielsen, and S. Molin, *Pattern differentiation in co-culture biofilms formed by Staphylococcus aureus and Pseudomonas aeruginosa*. FEMS Immunology & Medical Microbiology, 2011. **62**(3): p. 339-347.
6. Wang, V.B., S.-L. Chua, B. Cao, T. Seviour, V.J. Nesatyy, E. Marsili, et al., *Engineering PQS Biosynthesis Pathway for Enhancement of Bioelectricity Production in Pseudomonas aeruginosa Microbial Fuel Cells*. PLOS ONE, 2013. **8**(5): p. e63129.
7. Chua, S.L., Y. Ding, Y. Liu, Z. Cai, J. Zhou, S. Swarup, et al., *Reactive oxygen species drive evolution of pro-biofilm variants in pathogens by modulating cyclic-di-GMP levels*. Open Biology, 2016. **6**(11): p. 160162.
